# Supplementary material
Source: MDPI journal article supplement (https://www.mdpi.com/2077-0472/13/10/1864)
Supplement: s1 [file s1]

**Table S1.** Soil quality indicators for 0-60 cm, 2020-2022.

| Year | BD (g·cm <sup>-3</sup> )  |               |              |              | MWD (mm)                 |              |              |              |
|------|---------------------------|---------------|--------------|--------------|--------------------------|--------------|--------------|--------------|
|      | CTM                       | DTM20         | DTM40        | DTM60        | CTM                      | DTM20        | DTM40        | DTM60        |
| 2020 | 1.59±0.011a               | 1.56±0.011a   | 1.54±0.012b  | 1.52±0.004c  | 1.46±0.044a              | 1.45±0.032a  | 1.43±0.017a  | 1.36±0.042b  |
| 2021 | 1.60±0.017a               | 1.57±0.019b   | 1.55±0.011bc | 1.53±0.009c  | 1.46±0.055a              | 1.45±0.050a  | 1.37±0.043ab | 1.36±0.027b  |
| 2022 | 1.60±0.012a               | 1.57±0.012b   | 1.56±0.013bc | 1.54±0.008c  | 1.41±0.015a              | 1.39±0.019ab | 1.36±0.038ab | 1.34±0.034b  |
| Year | pH                        |               |              |              | EC (g·kg <sup>-1</sup> ) |              |              |              |
|      | CTM                       | DTM20         | DTM40        | DTM60        | CTM                      | DTM20        | DTM40        | DTM60        |
| 2020 | 8.157±0.018a              | 8.131±0.016ab | 8.093±0.011b | 8.002±0.041c | 3.55±0.487a              | 3.35±0.367a  | 2.45±0.523b  | 2.18±0.356b  |
| 2021 | 8.141±0.024a              | 8.103±0.024ab | 8.083±0.023b | 8.013±0.018c | 3.49±0.522a              | 3.39±0.533ab | 2.67±0.270bc | 2.21±0.149c  |
| 2022 | 8.122±0.031a              | 8.094±0.028ab | 8.068±0.023b | 7.975±0.007c | 3.45±0.687a              | 3.36±0.707a  | 2.28±0.286b  | 2.09±0.205b  |
| Year | SOC (g·kg <sup>-1</sup> ) |               |              |              | TN (g·kg <sup>-1</sup> ) |              |              |              |
|      | CTM                       | DTM20         | DTM40        | DTM60        | CTM                      | DTM20        | DTM40        | DTM60        |
| 2020 | 6.22±0.191b               | 6.34±0.181b   | 6.53±0.216ab | 6.74±0.132a  | 0.76±0.012a              | 0.76±0.009a  | 0.77±0.012a  | 0.78±0.014a  |
| 2021 | 6.18±0.172c               | 6.35±0.086bc  | 6.46±0.101ab | 6.67±0.132a  | 0.75±0.009b              | 0.76±0.008b  | 0.76±0.007b  | 0.77±0.008a  |
| 2022 | 6.19±0.199b               | 6.33±0.183ab  | 6.47±0.213ab | 6.68±0.098a  | 0.75±0.005c              | 0.76±0.011ab | 0.77±0.007b  | 0.78±0.009a  |
| Year | TP (g·kg <sup>-1</sup> )  |               |              |              | TK (g·kg <sup>-1</sup> ) |              |              |              |
|      | CTM                       | DTM20         | DTM40        | DTM60        | CTM                      | DTM20        | DTM40        | DTM60        |
| 2020 | 0.76±0.028a               | 0.75±0.027a   | 0.74±0.016a  | 0.74±0.013a  | 28.69±0.197a             | 28.79±0.023a | 28.68±0.090a | 28.55±0.201a |
| 2021 | 0.76±0.026a               | 0.76±0.026a   | 0.76±0.034a  | 0.76±0.028a  | 28.71±0.188a             | 28.60±0.169a | 28.61±0.183a | 28.41±0.078a |
| 2022 | 0.76±0.024a               | 0.76±0.025a   | 0.78±0.018a  | 0.78±0.019a  | 28.65±0.146ab            | 28.49±0.132b | 28.48±0.062b | 28.78±0.072a |

BD, soil bulk density; MWD, soil mean weight diameter; EC electrical conductivity; SOC, soil organic carbon; TN, total nitrogen; TK, total potassium; TP, total phosphorus. CTM, conventional tillage; DTM20, 20 cm; DTM40, 40 cm; DTM60, 60 cm.

**Table S2.** Seed cotton yield in 2020-2022

| Year | Seed cotton yield (kg·ha <sup>-1</sup> ) |                |                |                |
|------|------------------------------------------|----------------|----------------|----------------|
|      | CTM                                      | DTM20          | DTM40          | DTM60          |
| 2020 | 2727.30±87.58d                           | 3389.55±90.53c | 3974.10±80.44b | 4558.50±77.43a |
| 2021 | 2877.00±103.01d                          | 3900.45±86.12c | 4519.50±62.20b | 5147.25±88.69a |
| 2022 | 3235.65±80.66d                           | 4485.45±70.17c | 5287.80±79.91b | 6073.65±80.58a |

CTM, conventional tillage; DTM20, 20 cm; DTM40, 40 cm; DTM60, 60 cm.

**Table S3.** Data Normality distribution test

| <b>Shapiro–Wilk test</b> |                  |           |                       |
|--------------------------|------------------|-----------|-----------------------|
|                          | <b>statistic</b> | <b>DF</b> | <b><i>p</i>-value</b> |
| BD                       | 0.961            | 36        | 0.226                 |
| MWD                      | 0.975            | 36        | 0.564                 |
| PH                       | 0.969            | 36        | 0.411                 |
| EC                       | 0.944            | 36        | 0.067                 |
| SOC                      | 0.972            | 36        | 0.470                 |
| TN                       | 0.950            | 36        | 0.105                 |
| TP                       | 0.940            | 36        | 0.053                 |
| TK                       | 0.942            | 36        | 0.058                 |
| Seed cotton yield        | 0.959            | 36        | 0.198                 |
